# Supplementary material for: iSpinach: a fluorogenic RNA aptamer optimized for in vitro applications
Source: PubMed Central journal article supplement — Nucleic Acids Res. 2016 Mar 1;44(6):2491–500. doi: 10.1093/nar/gkw083 (PMC4824111; doi:10.1093/nar/gkw083), 2016-03-01
Supplement: supp_gkw083_nar-03578-h-2015-File007.pdf [file supp_gkw083_nar-03578-h-2015-File007.pdf]

# **iSpinach: a fluorogenic RNA aptamer optimized for *in vitro* applications**

**Alexis Autour, Eric Westhof and Michael Ryckelynck\***

Architecture et Réactivité de l'ARN, Université de Strasbourg,  
Institut de biologie moléculaire et cellulaire du CNRS,  
15 rue René Descartes, 67084, Strasbourg (France).  
E-mail: [m.ryckelynck@unistra.fr](mailto:m.ryckelynck@unistra.fr)

## **Supplementary information**

|                                                                                                                                                           |            |
|-----------------------------------------------------------------------------------------------------------------------------------------------------------|------------|
| <b>Supplementary Tables.....</b>                                                                                                                          | <b>2</b>   |
| <b>Table S1.</b> Folding efficiencies of Spinach2, Broccoli and iSpinach as a function of temperature in the presence of sodium or potassium...           | <b>2</b>   |
| <b>Table S2.</b> Experimental parameters.....                                                                                                             | <b>3</b>   |
| <b>Table S3.</b> Sequences of isolated mutants.....                                                                                                       | <b>4-5</b> |
| <b>Supplementary Figures.....</b>                                                                                                                         | <b>6</b>   |
| <b>Figure S1.</b> Fluorescence of isolated mutants.....                                                                                                   | <b>6</b>   |
| <b>Figure S2.</b> Mutations isolated from the <i>in vitro</i> evolution process and summary of the changes used to convert Spinach 1.1 into iSpinach..... | <b>7</b>   |
| <b>Figure S3.</b> Effect of the temperature on RNA/DFHBI complex dissociation....                                                                         | <b>8</b>   |
| <b>Figure S4.</b> Excitation and emission spectra of DFHBI in complex with Spinach2 or iSpinach in the presence of sodium or potassium.....               | <b>9</b>   |
| <b>References .....</b>                                                                                                                                   | <b>9</b>   |

## Supplementary Tables

**Table S1.** Folding efficiencies of Spinach2, Broccoli and iSpinach as a function of temperature in the presence of sodium or potassium. Values are expressed in percentage of folded molecule and are the mean of three independent experiments and error bars correspond to  $\pm 1$  standard error.

|                    | 25 °C           |                 | 37 °C          |                 | 45 °C          |                 |
|--------------------|-----------------|-----------------|----------------|-----------------|----------------|-----------------|
|                    | K <sup>+</sup>  | Na <sup>+</sup> | K <sup>+</sup> | Na <sup>+</sup> | K <sup>+</sup> | Na <sup>+</sup> |
| <b>Spinach 2.0</b> | 61.0 $\pm$ 12.2 | n.m.            | 27.0 $\pm$ 4.7 | n.m.            | 2.3 $\pm$ 1.4  | n.m.            |
| <b>Broccoli</b>    | 17.7 $\pm$ 3.2  | n.m.            | 15.5 $\pm$ 4.8 | n.m.            | 9.9 $\pm$ 2.6  | n.m.            |
| <b>iSpinach</b>    | 69.0 $\pm$ 4.0  | 59.6 $\pm$ 8.1  | 53.7 $\pm$ 3.7 | 23.6 $\pm$ 3.4  | 37.4 $\pm$ 3.2 | 6.4 $\pm$ 1.5   |

n.m. : not measurable

**Table S2.** Experimental parameters.

| Salt      | Round | PCR droplets occupancy (%) | $\lambda$ value <sup>a</sup> | Fusion efficiency (%) | Number of analyzed droplets | Number of sorted droplets |
|-----------|-------|----------------------------|------------------------------|-----------------------|-----------------------------|---------------------------|
| Sodium    | S1    | 32                         | 0.38                         | 92                    | 1,392,500                   | 9,028                     |
|           | S2    | 12                         | 0.12                         | 75                    | 250,950                     | 2,526                     |
|           | S3    | 15                         | 0.16                         | 85                    | 776,251                     | 11,278                    |
|           | S4    | 16                         | 0.17                         | 90                    | 879,000                     | 7,896                     |
| Potassium | S1    | 26                         | 0.30                         | 70                    | 738,875                     | 22,730                    |
|           | S2    | 23                         | 0.26                         | 87                    | 397,950                     | 4,514                     |
|           | S3    | 17                         | 0.18                         | 80                    | 1,526,750                   | 28,071                    |
|           | S4    | 18                         | 0.19                         | 75                    | 225,750                     | 2,589                     |

<sup>a</sup> Calculated as described in (1).





## Supplementary Figures

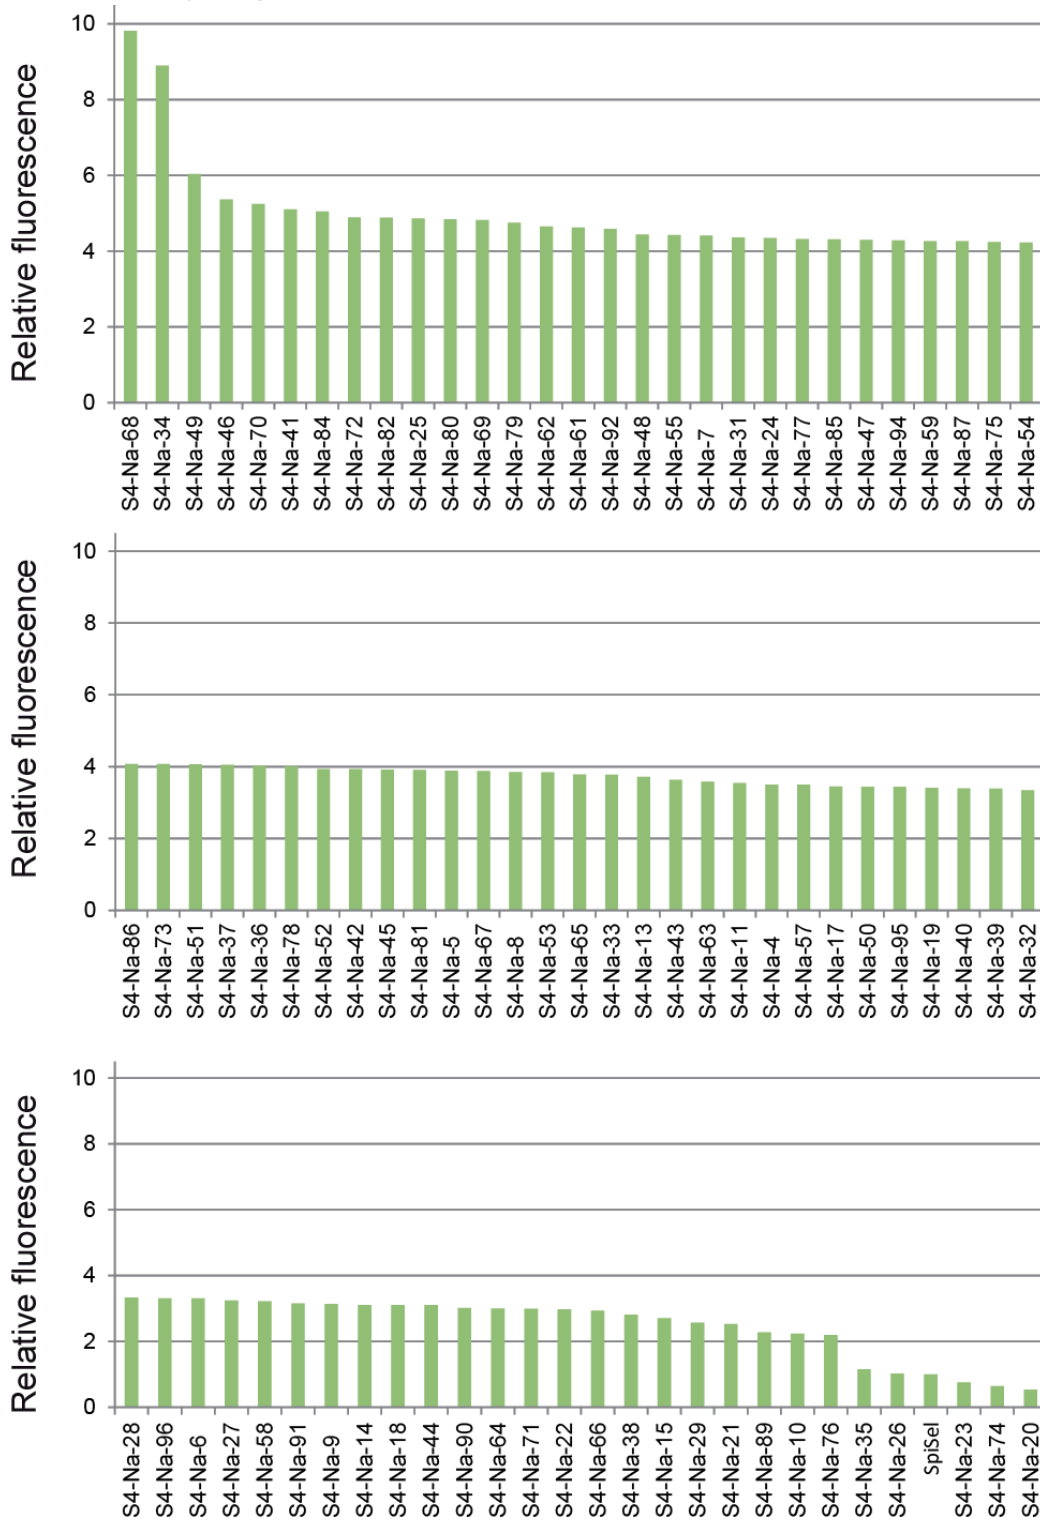

**Figure S1.** Fluorescence of isolated mutants. Aptamer-coding genes were PCR amplified and DNA *in vitro* transcribed in the presence of DFHBI. The co-transcriptional fluorescence increase was monitored at 37°C. Relative fluorescence was calculated by dividing the fluorescence increase rate of the analyzed clone by the one of SpiSel.



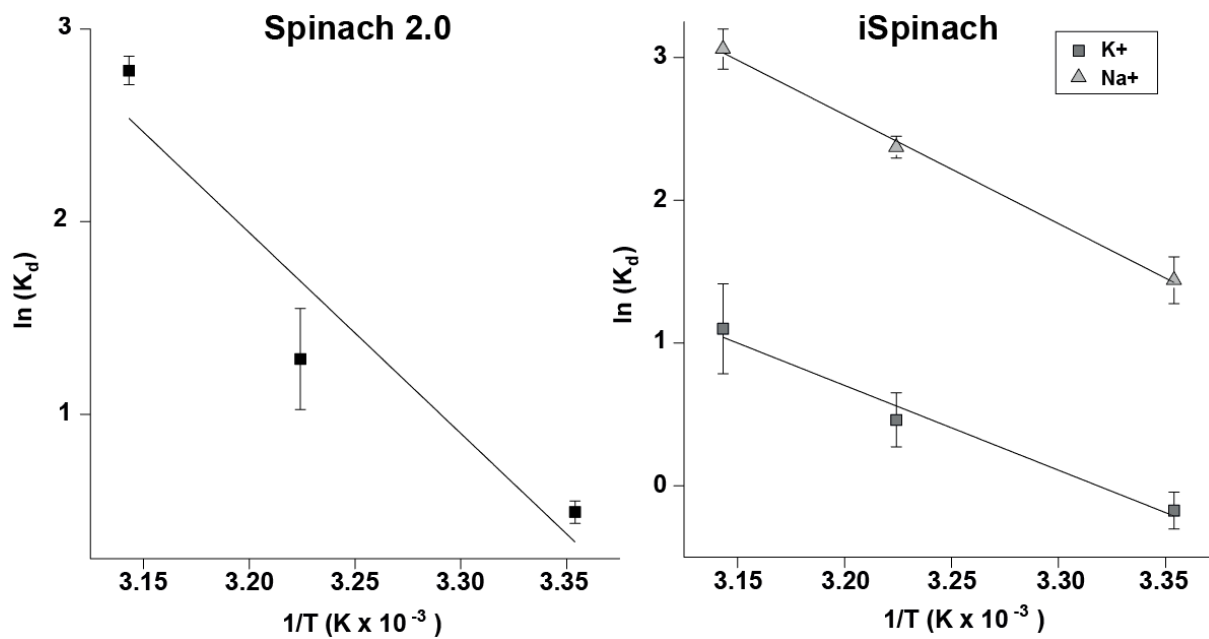

**Figure S3.** Effect of the temperature on RNA/DFHBI complex dissociation. Arrhenius plots are shown for DFHBI in complex with Spinach2 (left) or iSpinach (right) in the presence of potassium (squares) or sodium (triangles).



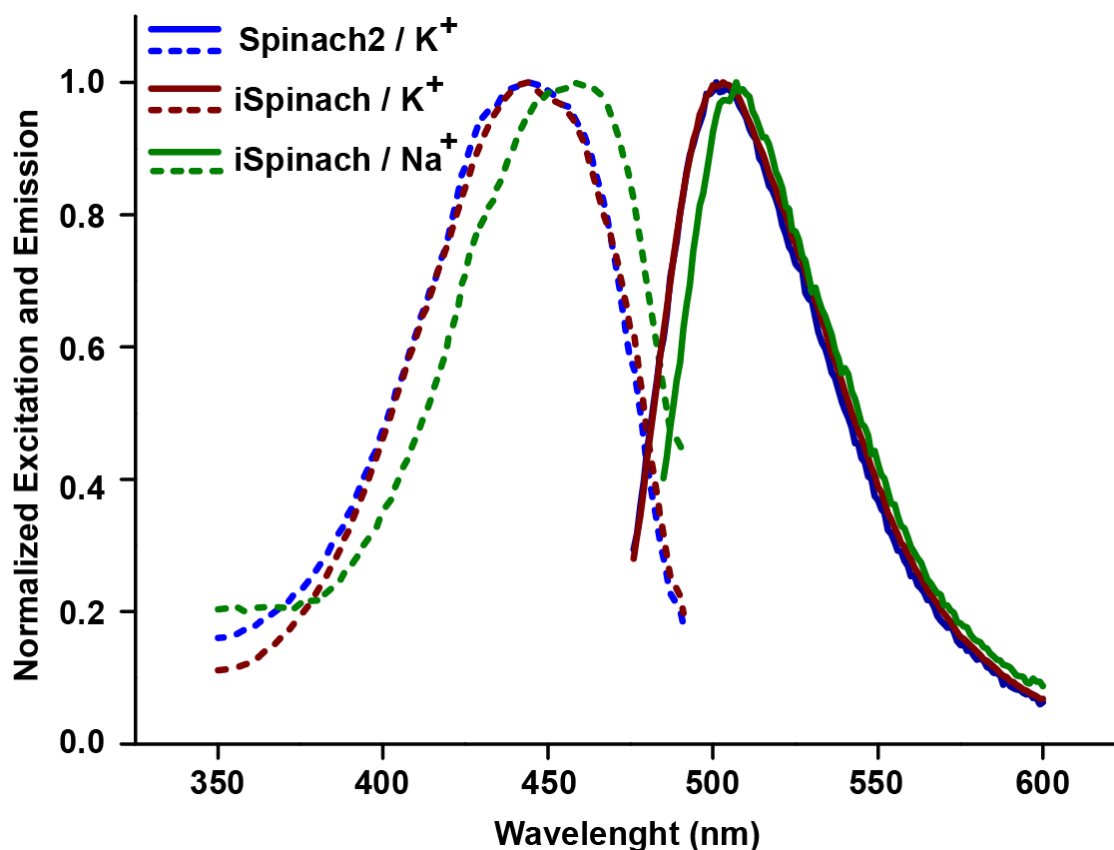

**Figure S4.** Excitation and emission spectra of DFHBI in complex with Spinach2 or iSpinach in the presence of sodium or potassium. Excitations spectra (dashed lines) were determined by recording the fluorescence emitted at 500 nm following excitation at a wavelength ranging from 350 nm to 400 nm with a step of 1 nm. Emission spectra (continuous line) were determined by exciting the sample at 400 nm and recording the fluorescence emitted from 475 nm to 600 nm with a step of 1 nm.

## References

1. Ryckelynck, M., Baudrey, S., Rick, C., Marin, A., Coldren, F., Westhof, E. and Griffiths, A.D. (2015) Using droplet-based microfluidics to improve the catalytic properties of RNA under multiple-turnover conditions. *RNA*, **21**, 458-469.
2. Warner, K.D., Chen, M.C., Song, W., Strack, R.L., Thorn, A., Jaffrey, S.R. and Ferre-D'Amare, A.R. (2014) Structural basis for activity of highly efficient RNA mimics of green fluorescent protein. *Nature structural & molecular biology*, **21**, 658-663.
